# Supplementary material for: The Algerian Chapter of SARS-CoV-2 Pandemic: An Evolutionary, Genetic, and Epidemiological Prospect
Source: MDPI journal article supplement (doi:10.3390/v13081525), 2021-08-02
Supplement: s1 [file s1]

We gratefully acknowledge the following Authors from the Originating laboratories responsible for obtaining the specimens, as well as the Submitting laboratories where the genome data were generated and shared via GISAID, on which this research is based.

All Submitters of data may be contacted directly via [www.gisaid.org](http://www.gisaid.org)

Authors are sorted alphabetically.

| Accession ID                                                                                                          | Originating Laboratory                                                                            | Submitting Laboratory                                                                                                                                                                                               | Authors                                                                                                                                                                                                                                                                                                                                                                                                                                                                                                                                                                                                                                                                                                        |
|-----------------------------------------------------------------------------------------------------------------------|---------------------------------------------------------------------------------------------------|---------------------------------------------------------------------------------------------------------------------------------------------------------------------------------------------------------------------|----------------------------------------------------------------------------------------------------------------------------------------------------------------------------------------------------------------------------------------------------------------------------------------------------------------------------------------------------------------------------------------------------------------------------------------------------------------------------------------------------------------------------------------------------------------------------------------------------------------------------------------------------------------------------------------------------------------|
| EPI_ISL_1000947                                                                                                       | Bioinformatics and Biostatistics Lab, Advanced Sequencing Facility                                | COVID-19 Genomics UK (COG-UK) Consortium                                                                                                                                                                            | Aengus Stewart,Jerome Nicod,Chelsea Sawyer,Laura Cubitt,Harshil Patel,Margaret Crawford                                                                                                                                                                                                                                                                                                                                                                                                                                                                                                                                                                                                                        |
| EPI_ISL_1040650                                                                                                       | Groote Schuur Hospital wc GSH                                                                     | NHLS/UCT                                                                                                                                                                                                            | Arash Iranzadeh, Deelan Doolabh, Lynn Tyers, Bruna Galvao, Innocent Mudau, Marvin Hsiao, Kruger Marais, Diana Hardie, Stephen Korsman, Carolyn Williamson                                                                                                                                                                                                                                                                                                                                                                                                                                                                                                                                                      |
| EPI_ISL_1070637                                                                                                       | Lighthouse Lab in Cambridge                                                                       | Wellcome Sanger Institute for the COVID-19 Genomics UK (COG-UK) Consortium                                                                                                                                          | Rob Howes, The Lighthouse Lab in Cambridge and Alex Alderton, Roberto Amato, Jeffrey Barrett, Sonia Goncalves, Ewan Harrison, David K. Jackson, Ian Johnston, Dominic Kwiatkowski, Cordelia Langford, John Sillitoe on behalf of the Wellcome Sanger Institute COVID-19 Surveillance Team                                                                                                                                                                                                                                                                                                                                                                                                                      |
| EPI_ISL_1079162                                                                                                       | IAL Regional de Bauru                                                                             | Instituto Adolfo Lutz, Interdisciplinary Procedures Center, Strategic Laboratory                                                                                                                                    | Claudio Tavares Sacchi, Claudia Regina Gonçalves, Erica Valesa Ramos Gomes, Karoline Rodrigues Campos                                                                                                                                                                                                                                                                                                                                                                                                                                                                                                                                                                                                          |
| EPI_ISL_1081794                                                                                                       | Philippine Red Cross                                                                              | Philippine Genome Center                                                                                                                                                                                            | Francis A. Tablizo, Cynthia P. Saloma, Marc Jerrone R. Castro, Kenneth M. Kim, Maria Sofia L. Yangzon, Carlo M. Lapid, Benedict A. Maralit, Marc Edsel C. Ayes, Jan Michael C. Yap, Jo-Hannah S. Llamas, Sheila Mae M. Araiza, Kris P. Punayan, Irish Coleen A. Asin, Candice Francheska B. Tambaoan, Asia Louisa U. Chong, Karol Sophia Agape R. Padilla, Rianna Patricia S. Cruz, El King D. Morado, Joshua Gregor A. Dizon, Eva Maria Cutiongco-de la Paz, Alethea R. de Guzman, Razel Nikka M. Hao, Arianne A. Zamora, Devon Ray Pacial, Juan Antonio R. Magalang, Marissa Alejandria, Celia Carlos, Anna Ong-Lim, Edsel Maurice Salvaña, John Q. Wong, Jaime C. Montoya, and Maria Rosario Singh-Vergeire |
| EPI_ISL_1081831                                                                                                       | Philippine Red Cross - Clark                                                                      | Philippine Genome Center                                                                                                                                                                                            | Francis A. Tablizo, Cynthia P. Saloma, Marc Jerrone R. Castro, Kenneth M. Kim, Maria Sofia L. Yangzon, Carlo M. Lapid, Benedict A. Maralit, Marc Edsel C. Ayes, Jan Michael C. Yap, Jo-Hannah S. Llamas, Sheila Mae M. Araiza, Kris P. Punayan, Irish Coleen A. Asin, Candice Francheska B. Tambaoan, Asia Louisa U. Chong, Karol Sophia Agape R. Padilla, Rianna Patricia S. Cruz, El King D. Morado, Joshua Gregor A. Dizon, Eva Maria Cutiongco-de la Paz, Alethea R. de Guzman, Razel Nikka M. Hao, Arianne A. Zamora, Devon Ray Pacial, Juan Antonio R. Magalang, Marissa Alejandria, Celia Carlos, Anna Ong-Lim, Edsel Maurice Salvaña, John Q. Wong, Jaime C. Montoya, and Maria Rosario Singh-Vergeire |
| EPI_ISL_1086034                                                                                                       | Diagnosticos da America - DASA                                                                    | Instituto Adolfo Lutz, Interdisciplinary Procedures Center, Strategic Laboratory                                                                                                                                    | Claudio Tavares Sacchi, Claudia Regina Gonçalves, Erica Valesa Ramos Gomes, Karoline Rodrigues Campos, Caio Vinicius Dias Lopes                                                                                                                                                                                                                                                                                                                                                                                                                                                                                                                                                                                |
| EPI_ISL_1093427                                                                                                       | Influenza and respiratory viruses lab. Pasteur Institute in Algeria                               | Human virology Department                                                                                                                                                                                           | A.Hachid, F.A.Khardine, M.A. Beloufa, F.Derrar                                                                                                                                                                                                                                                                                                                                                                                                                                                                                                                                                                                                                                                                 |
| EPI_ISL_1093428                                                                                                       | Influenza and respiratory viruses. Pasteur Institute in Algeria                                   | Human virology deptment                                                                                                                                                                                             | A.Hachid, F.A.Khardine, F.Derrar                                                                                                                                                                                                                                                                                                                                                                                                                                                                                                                                                                                                                                                                               |
| EPI_ISL_1093429                                                                                                       | Influenza and respiratory viruses Lab. Pasteur Institute in Algeria                               | Human Virology Department                                                                                                                                                                                           | A.Hachid, F.A.Khardine, M.A.Beloufa, F.Derrar                                                                                                                                                                                                                                                                                                                                                                                                                                                                                                                                                                                                                                                                  |
| EPI_ISL_1093430                                                                                                       | Influenza and respiratory viuruses Lab. Pasteur Institute in Algeria                              | Human Virology Department                                                                                                                                                                                           | A.Hachid, F.A.Khardine, M.A.Beloufa, F.Derrar                                                                                                                                                                                                                                                                                                                                                                                                                                                                                                                                                                                                                                                                  |
| EPI_ISL_1240719, EPI_ISL_1240720, EPI_ISL_1240721, EPI_ISL_1240722, EPI_ISL_1240723, EPI_ISL_1240724, EPI_ISL_1240725 | Influenza and respiratory viruses                                                                 | Human virology Department                                                                                                                                                                                           | A.Hachid, F.Khardine, M.A.Beloufa, A.Bensalem, F.Derrar                                                                                                                                                                                                                                                                                                                                                                                                                                                                                                                                                                                                                                                        |
| EPI_ISL_1253807                                                                                                       | Broad Institute Clinical Research Sequencing Platform                                             | Infectious Disease Program, Broad Institute of Harvard and MIT                                                                                                                                                      | Lemieux,J.E., Siddle,K.J., Adams,G., Gladden-Young,A., Lagerborg,K., Rudy,M., DeRuff,K., Carter,A., Normandin,E., Bauer,M., Reilly,S., Tomkins-Tinch,C., Loreth,C., Chaluvadi,S., Birren,B.W., Gallagher,G., Smole,S., Park,D.J., MacInnis,B.L., and Sabeti,P.C.                                                                                                                                                                                                                                                                                                                                                                                                                                               |
| EPI_ISL_1253966                                                                                                       | Rhode Island Department of Health                                                                 | Infectious Disease Program, Broad Institute of Harvard and MIT                                                                                                                                                      | Lemieux,J.E., Siddle,K.J., Huard,R., King,E., Azevedo,K., Miller,A., Adams,G., Gladden-Young,A., Lagerborg,K., Rudy,M., DeRuff,K., Carter,A., Normandin,E., Bauer,M., Reilly,S., Tomkins-Tinch,C., Loreth,C., Chaluvadi,S., Birren,B.W., Gallagher,G., Smole,S., Park,D.J., MacInnis,B.L., and Sabeti,P.C.                                                                                                                                                                                                                                                                                                                                                                                                     |
| EPI_ISL_402123                                                                                                        | Institute of Pathogen Biology, Chinese Academy of Medical Sciences & Peking Union Medical College | Institute of Pathogen Biology, Chinese Academy of Medical Sciences & Peking Union Medical College                                                                                                                   | Lili Ren, Jianwei Wang, Qi Jin, Zichun Xiang, Zhiqiang Wu, Chao Wu, Yiwei Liu                                                                                                                                                                                                                                                                                                                                                                                                                                                                                                                                                                                                                                  |
| EPI_ISL_403962                                                                                                        | Bamrasnaradura Hospital                                                                           | 1. Department of Medical Sciences, Ministry of Public Health, Thailand 2. Thai Red Cross Emerging Infectious Diseases - Health Science Centre 3. Department of Disease Control, Ministry of Public Health, Thailand | Pilailuk,Okada; Siripaporn,Phuygun; Thanutsapa,Thanadachakul; Supaporn,Wacharapluesadee; Sittiporn,Pammnen; Warawan,Wongboot; Sunthareeya,Waicharoen; Rome,Buathong; Malinee,Chittaganpitch; Nanthawan,Mekha                                                                                                                                                                                                                                                                                                                                                                                                                                                                                                   |
| EPI_ISL_410546                                                                                                        | INMI Lazzaro Spallanzani IRCCS                                                                    | Laboratory of Virology, INMI Lazzaro Spallanzani IRCCS                                                                                                                                                              | Maria R. Capobianchi, Cesare E. M. Gruber, Martina Rueca, Fabrizio Carletti, Barbara Bartolini, Francesco Messina, Emanuela Giombini, Francesca Colavita, Concetta Castilletti, Eleonora Lalle, Emanuele Nicastrì, Giuseppe Ippolito.                                                                                                                                                                                                                                                                                                                                                                                                                                                                          |
| EPI_ISL_412116                                                                                                        | Respiratory Virus Unit, Microbiology Services Colindale, Public Health England                    | Respiratory Virus Unit, Microbiology Services Colindale, Public Health England                                                                                                                                      | Monica Galiano, Shahjahan Miah, Angie Lackenby, Omolola Akinbami, Tiina Talts, Leena Bhaw, Richard Myers, Steven Platt, Kirstin Edwards, Jonathan Hubb, Joanna Ellis, Maria Zambon                                                                                                                                                                                                                                                                                                                                                                                                                                                                                                                             |
| EPI_ISL_412972                                                                                                        | Instituto Nacional de Enfermedades Respiratorias                                                  | Instituto de Diagnostico y Referencia Epidemiologicos (INDRE)                                                                                                                                                       | Ramirez-Gonzalez Ernesto, Garcés-Ayala Fabiola, Araiza-Rodríguez Adnan, Mendieta-Condado Edgar, Rodríguez-Maldonado Abril, Wong-Arambula Claudia, Vazquez-Perez Joel, Martínez Arturo, Boukadida Celia, Muñoz-Medina Esteban, Sánchez Alejandro, Isa Pavel, Taboada Blanca, Lopez Susana, Arias Carlos, Barrera-Badillo Gisela, Hernandez-Rivas Lucia, Lopez-Martinez Irma                                                                                                                                                                                                                                                                                                                                     |
| EPI_ISL_413565                                                                                                        | Foundation Pamm                                                                                   | Erasmus Medical Center                                                                                                                                                                                              | David Nieuwenhuijse, Bas Oude Munnink, Reina Sikkema, Claudia Schapendonk, Irina Chestakova, Anne van der Linden, Mark Pronk, Pascal Lexmond, Corien Swaan, Manon Haverkate, Madelief Mollers, Mart Stein, Sandra Kengne Kamga Mobou, Jeroen van Kampen, Jolanda Voermans, Aura Timen, Corine GeurtsvanKessel, Annemiek van der Eijk, Richard Molenkamp, Marion Koopmans, on behalf of the Dutch national COVID-19 response team.                                                                                                                                                                                                                                                                              |
| EPI_ISL_414630                                                                                                        | Centre Hospitalier Compiègne Laboratoire de Biologie                                              | National Reference Center for Viruses of Respiratory Infections, Institut Pasteur, Paris                                                                                                                            | Mélinie Albert, Marion Barbet, Sylvie Behillil, Méline Bizard, Angela Brisebarre, Flora Donati, Etienne Simon-Lorière, Vincent Enouf, Maud Vanpeeene, Sylvie van der Werf, Raulin Olivia                                                                                                                                                                                                                                                                                                                                                                                                                                                                                                                       |
| EPI_ISL_415581                                                                                                        | BCCDC Public Health Laboratory                                                                    | BCCDC Public Health Laboratory                                                                                                                                                                                      | Harrigan, Prystajacky, Krajden, Lee, Kamelian, Lapointe, Choi, Hoang, Sekirov, Levett, Tyson, Snutch, Loman, Quick, Li, Gilmour                                                                                                                                                                                                                                                                                                                                                                                                                                                                                                                                                                                |
| EPI_ISL_416411                                                                                                        | Victorian Infectious Diseases Reference Laboratory (VIDRL)                                        | Victorian Infectious Diseases Reference Laboratory and Microbiological Diagnostic Unit Public Health Laboratory, Doherty Institute                                                                                  | Caly L., Seemann T., Schultz M., Druce J., Taiaroa, G.                                                                                                                                                                                                                                                                                                                                                                                                                                                                                                                                                                                                                                                         |
| EPI_ISL_416498                                                                                                        | Institut Médico légal- Hop R. Poincaré                                                            | National Reference Center for Viruses of Respiratory Infections, Institut Pasteur, Paris                                                                                                                            | Mélinie Albert, Marion Barbet, Sylvie Behillil, Méline Bizard, Angela Brisebarre, Flora Donati, Etienne Simon-Lorière, Vincent Enouf, Maud Vanpeeene, Sylvie van der Werf                                                                                                                                                                                                                                                                                                                                                                                                                                                                                                                                      |
| EPI_ISL_417010                                                                                                        | FUNDACION JIMENEZ DIAZ                                                                            | Instituto de Salud Carlos III                                                                                                                                                                                       | Iglesias-Caballero, M. Molinero Calamita, M. González-Esguevillas, M. Camarero, S. Pozo, F. Casas, I. Jiménez, P. Jiménez, M. Zaballos, A. Monzón, S. Varona, S. Juliá, M. Cuesta, I. Fernández Roblas, R.                                                                                                                                                                                                                                                                                                                                                                                                                                                                                                     |
| EPI_ISL_417547                                                                                                        | deCODE genetics                                                                                   | deCODE genetics                                                                                                                                                                                                     | Daniel F Gudbjartsson; Agnar Helgason; Hakon Jonsson; Olafur T Magnusson; Pall Melsted; Gudmundur L Norddahl; Jona Saemundsdottir; Asgeir                                                                                                                                                                                                                                                                                                                                                                                                                                                                                                                                                                      |

|                                |                                                                                                                            |                                                                                                                                           |                                                                                                                                                                                                                                                                                                                                                                                                                                                                                                                                                                                                                                                  |
|--------------------------------|----------------------------------------------------------------------------------------------------------------------------|-------------------------------------------------------------------------------------------------------------------------------------------|--------------------------------------------------------------------------------------------------------------------------------------------------------------------------------------------------------------------------------------------------------------------------------------------------------------------------------------------------------------------------------------------------------------------------------------------------------------------------------------------------------------------------------------------------------------------------------------------------------------------------------------------------|
| EPI_ISL_418241, EPI_ISL_418242 | NIC Viral Respiratory Unit - Institut Pasteur of Algeria                                                                   | National Reference Center for Viruses of Respiratory Infections, Institut Pasteur, Paris                                                  | Sigurdsson; Patrick Sulem; Arna B Agustsdottir; Berglind Eiriksdothir; Run Fridriksdottir; Elisabet E Gardarsdottir; Gudmundur Georgsson; Olafia S Gretarsdottir; Kjartan R Gudmundsson; Thora R Gunnarsdottir; Arnaldur Gylfason; Hilma Holm; Brynjar O Jensson; Aslaug Jonasdottir; Kamilla S Josefsdottir; Thordur Kristjansson; Droplaug N Magnusdottir; Louise le Roux; Gudrun Sigmundsdottir; Gardar Sveinbjornsson; Kristin E Sveinsdottir; Maney Sveinsdottir; Emil A Thorarensen; Bjarni Thorbjornsson; Gisli Masson; Ingileif Jonsdottir; Alma Moller; Thorolfur Gudnason; Karl G Kristinsson; Unnur Thorsteinsdottir; Kari Stefansson |
|                                | EPI_ISL_418243                                                                                                             | HOSPITAL UNIVERSITARIO VIRGEN DE LAS NIEVES                                                                                               | Mélanie Albert, Marion Barbet, Sylvie Behillil, Méline Bizard, Angela Brisebarre, Flora Donati, Etienne Simon-Lorière, Vincent Enouf, Maud Vanpeene, Sylvie van der Werf, Fawzi Derrar                                                                                                                                                                                                                                                                                                                                                                                                                                                           |
| EPI_ISL_419871                 | Victorian Infectious Diseases Reference Laboratory (VIDRL)                                                                 | Victorian Infectious Diseases Reference Laboratory and Microbiological Diagnostic Unit Public Health Laboratory, Doherty Institute        | Iglesias-Caballero, M. Molinero Calamita, M. González-Esguevillas, M. Camarero, S. Pozo, F. Casas, I. Jiménez, P. Jiménez, M. Zaballos, A. Monzón, S. Varona, S. Juliá, M. Cuesta, I. Sanbonmatsu S.                                                                                                                                                                                                                                                                                                                                                                                                                                             |
| EPI_ISL_420037                 | NIC Viral Respiratory Unit - Institut Pasteur of Algeria                                                                   | National Reference Center for Viruses of Respiratory Infections, Institut Pasteur, Paris                                                  | Caly L., Seemann T., Sait, M., Schultz M., Druce J., Sherry, N.                                                                                                                                                                                                                                                                                                                                                                                                                                                                                                                                                                                  |
| EPI_ISL_420134                 | Akershus University Hospital, Department for Microbiology and Infectious Disease Control                                   | Norwegian Institute of Public Health, Department of Virology                                                                              | Mélanie Albert, Marion Barbet, Sylvie Behillil, Méline Bizard, Angela Brisebarre, Flora Donati, Etienne Simon-Lorière, Vincent Enouf, Maud Vanpeene, Sylvie van der Werf, Fawzi Derrar                                                                                                                                                                                                                                                                                                                                                                                                                                                           |
| EPI_ISL_420314                 | KU Leuven, Clinical and Epidemiological Virology                                                                           | KU Leuven, Clinical and Epidemiological Virology                                                                                          | Kathrine Stene-Johansen, Kamilla Heddeland Instefjord, Hilde Elshaug, Karoline Bragstad, Olav Hungnes                                                                                                                                                                                                                                                                                                                                                                                                                                                                                                                                            |
| EPI_ISL_424278                 | UW Virology Lab                                                                                                            | UW Virology Lab                                                                                                                           | Joan Marti-Carreras, Bert Vanmechelen, Tony Wawina, Piet Maes                                                                                                                                                                                                                                                                                                                                                                                                                                                                                                                                                                                    |
| EPI_ISL_428671                 | Centre for Dengue Research                                                                                                 | Centre for Dengue Research                                                                                                                | Pavitra Roychoudhury, Hong Xie, Keith Jerome, Alexander Greninger                                                                                                                                                                                                                                                                                                                                                                                                                                                                                                                                                                                |
| EPI_ISL_431102                 | Department of MicroBiology,Gandhi Medical College and Hospital,Secendrabad,Hyderabad,India                                 | Department of Microbiology, Gandhi Medical College and Hospital, Secendrabad, Hyderabad                                                   | Chandima Jeewandara, Dinuka Ariyane, Laksiri Gomes, Deshni Jayathilaka, Diyanath Ranasinghe, Ananda Wijewickrama, Eranga Narangoda, Damayanthi Tdampitiya, Neelika Malavige                                                                                                                                                                                                                                                                                                                                                                                                                                                                      |
| EPI_ISL_437689                 | Laboratory for Urgent Response to Biological Threats                                                                       | Institut Pasteur CIBU / ERI                                                                                                               | Nagamani K, Muttineni Radhakrishna, Thirlok Chander B, Raja Rao M, Kalyani Putty, Ravikumar P, Sunitha P, Pankaj Singh D, Anand Kumar K, Amit A Upadhyay, Steven E. Bosinger, Rama Amara                                                                                                                                                                                                                                                                                                                                                                                                                                                         |
| EPI_ISL_437994                 | Center for Virology, Medical University of Vienna                                                                          | Bergthaler laboratory, CeMM Research Center for Molecular Medicine of the Austrian Academy of Sciences                                    | V. Caro, A. Kwasiborski, V. Hourdel, C. Balière, J. Vanhornwegen, C. Batéjat, JC. Manuguerra                                                                                                                                                                                                                                                                                                                                                                                                                                                                                                                                                     |
| EPI_ISL_447653                 | unknown                                                                                                                    | Department of Medicine                                                                                                                    | Alexandra Popa, Benedikt Agerer, Henrique Colaco, Lukas Endler, Jakob-Wendelin Genger, Alexander Lercher, Mark Smyth, Thomas Penz, Michael Schuster, Jan Laine, Martin Senekowitsch, Judith Aberle, Stephan Aberle, Elisabeth Puchhammer-Stoeckl, Manfred Nairz, Guenter Weiss, Wegene Borena, Dorothee von Laer, Christoph Bock, Andreas Berghaler                                                                                                                                                                                                                                                                                              |
| EPI_ISL_449872, EPI_ISL_449933 | Washington State Department of Health                                                                                      | Seattle Flu Study                                                                                                                         | Kassela,K., Dovrolis,N., Bampali,M., Gatzidou,E., Froukala,E., Stavropoulou,A., Veleza,S., Tsakris,A., Spanakis,N. and KarakasiIiotis,I.                                                                                                                                                                                                                                                                                                                                                                                                                                                                                                         |
| EPI_ISL_451186                 | Uganda Virus Research Institute                                                                                            | MRC/UVRI & LSHTM Uganda Research Unit                                                                                                     | Chu et al                                                                                                                                                                                                                                                                                                                                                                                                                                                                                                                                                                                                                                        |
| EPI_ISL_454416                 | Department of Medical Microbiology, Leiden University Medical Center                                                       | Department of Medical Microbiology, Leiden University Medical Center                                                                      | Dan Lule Bugembe, John Kayiwa, My V.T Phan, Phionah Tushabe, Stephen Balinandi, Beatrice Dhaala, Deogratius Ssemwanga, Jonas Lexow, Henry Mwebesa, Jane Aceng, Henry Kyobe, Julius Lutwama, Pontiano Kaleebu, Matthew Cotten                                                                                                                                                                                                                                                                                                                                                                                                                     |
| EPI_ISL_455479                 | Laboratory for Respiratory Viruses, Cantacuzino National Military-Medical Institute for Research and Development           | Cantacuzino Institute                                                                                                                     | Snijder,E.J., Ogando,N.S., Zevenhoven,J.C., Dalebout,T.J., de Vries,J.J. and Sidorov,I.                                                                                                                                                                                                                                                                                                                                                                                                                                                                                                                                                          |
| EPI_ISL_455918                 | Ramathibodi Hospital                                                                                                       | COVID-19 Network Investigations (CONI) Alliance                                                                                           | M.Lazar, L.Ustea, A.Cretu, T.Durfee                                                                                                                                                                                                                                                                                                                                                                                                                                                                                                                                                                                                              |
| EPI_ISL_458094                 | B.J. Medical College and Civil hospital                                                                                    | Gujarat Biotechnology Research Centre                                                                                                     | Elizabeth Batty, Wasun Chantratita, Thanat Chookajorn, Stefan Fernandez, Angkana Huang, Anthony R. Jones, Khajohn Joonsalak, Chonticha Klungtong, Theerarat Kochakarn, Namfon Kotanan, Krittikorn Kumpornsin, Wudtichai Manasatienkij, Bhakbhoon Panthan, Ekawat Pasomsub, Kingkan Rakmanee, Insee Sensorn, Janjira Thaipadungpanit, Arporn Wangwiwatsin, Treewat Watthanachockchai                                                                                                                                                                                                                                                              |
| EPI_ISL_471159, EPI_ISL_471160 | MRCG at LSHTM Genomics lab                                                                                                 | MRCG at LSHTM Genomics lab                                                                                                                | Nitin Savaliya, Raghawendra Kumar, Dinesh Kumar, Zuber Saiyed, Komal Patel, Labdhi Pandya, Snehal Bagatharia, Dhaval Vaghela, Ramesh Patel, Pranay Shah, Kamlesh J Upadhyay, Ramesh Pandit, Tejas Shah, Ankit Hinsu, Pritesh Sabara, Apurvasinh Puvar, Janvi Raval, Zarna Patel, Monika Gandhi, Pinal Trivedi, Maharshi Pandya, Amit Kanani, Nidhi Patel, Priyanka P Vatsa, Bhavesh Modi, Gaurishankar Shrimali, R D Dixit, A M Kadri, Umang Mishra, Chaitanya Joshi, Madhvi Joshi                                                                                                                                                               |
| EPI_ISL_475023                 | Israel Central Virology laboratory                                                                                         | Israel Central Virology laboratory                                                                                                        | Sesay et al                                                                                                                                                                                                                                                                                                                                                                                                                                                                                                                                                                                                                                      |
| EPI_ISL_476559                 | unknown                                                                                                                    | Laboratoire Sciences et Technologies de la Santé (STS) Institut Supérieur des Sciences de la Santé Université Hassan 1er, Settat, Morocco | Neta Zuckerman, Efrat Dahan Bucris, Oran Erster, Ella Mendelson, Michal Mandelboim                                                                                                                                                                                                                                                                                                                                                                                                                                                                                                                                                               |
| EPI_ISL_477142                 | Institut Pasteur Dakar                                                                                                     | Institut Pasteur de Dakar                                                                                                                 | Hajar Lemriss, Sanaâ Lemriss, Amal Souiri, Narjis Amar, Mustapha Mouallif, Touria Essayagh, Jawad Bouzid, Saâd EL Kabbaj, Abderraouf Hilali                                                                                                                                                                                                                                                                                                                                                                                                                                                                                                      |
| EPI_ISL_480243                 | Genomic Laboratory (GLAB) (Conjoint lab of Health Directorate of Istanbul and Istanbul Technical University)               | Genomic Laboratory (GLAB), Istanbul Technical University                                                                                  | Ndongo Dia, Moussa Moise Diagne, Mamadou Diop, Mamadou Malado Jallow, Marie Henriette Dior Ndione, Safietou Sankhe, Ousmane Faye, Amadou Alpha Sall.                                                                                                                                                                                                                                                                                                                                                                                                                                                                                             |
| EPI_ISL_491247                 | Instituto Gulbenkian de Ciência                                                                                            | Instituto Gulbenkian de Ciência                                                                                                           | Ilker Karacan, Tugba Kizilboga Akgun, Bugra Agaoglu, Gizem Alkurt, Jale Yildiz, Betsi Köse, Elifnaz Çelik, Arzu Irvem, Yasemin Kendir Demirkol, Ozlem Akgun Dogan, Mehtap Aydn, Levent Doganay, Gizem Dinler Doganay                                                                                                                                                                                                                                                                                                                                                                                                                             |
| EPI_ISL_512616                 | National Laboratory for Influenza/Virology reference laboratory, Public Health Center of the Ministry of Health of Ukraine | Respiratory Virus Unit, Microbiology Services Colindale, Public Health England                                                            | Joao Sobral, Susana Ladeiro, João Costa, Cathy Paulino, Ricardo Leite                                                                                                                                                                                                                                                                                                                                                                                                                                                                                                                                                                            |
| EPI_ISL_526223                 | Hungarian Defence Forces Military Medical Centre                                                                           | National Laboratory of Virology, Szentágothai Research Centre                                                                             | PHE Covid Sequencing Team, Dr. Iryna Demchyshyna                                                                                                                                                                                                                                                                                                                                                                                                                                                                                                                                                                                                 |
| EPI_ISL_527891                 | Nigeria Centre for Disease Control (NCDC)                                                                                  | African Centre of Excellence for Genomics of Infectious Diseases (ACEGID), Redeemer's University, Ede, Osun State, Nigeria                | Endre Gábor Tóth, Balázs Somogyi, Bálint Eszenyi, Ferenc Jakab, Gábor Kemenesi                                                                                                                                                                                                                                                                                                                                                                                                                                                                                                                                                                   |
| EPI_ISL_529008                 | Servizio di igiene e sanità pubblica (SIESP)-Teramo                                                                        | Istituto Zooprofilattico Sperimentale dell'Abruzzo e Molise "G.Caporale"                                                                  | Oluniyi P.E. et al                                                                                                                                                                                                                                                                                                                                                                                                                                                                                                                                                                                                                               |
| EPI_ISL_613440                 | Institut Pasteur de la Guadeloupe                                                                                          | Institut Pasteur de la Guadeloupe                                                                                                         | Lorusso A, Marcacci M, Di Domenico M, Curini V, Ancora M, Cammà C, Rinaldi A, Mangone I, Di Pasquale A, Puglia I, Savini G.                                                                                                                                                                                                                                                                                                                                                                                                                                                                                                                      |
| EPI_ISL_644681                 | CHU Montpellier                                                                                                            | CNR Virus des Infections Respiratoires - France SUD                                                                                       | Marion Barbet, Sylvie Behillil, Méline Bizard, Angela Brisebarre, Camille Capel, Etienne Simon-Lorière, Vincent Enouf, Maud Vanpeene, Sylvie van der Werf, Stéphanie Guyomard, Sébastien Breurec, Antoine Talarmin                                                                                                                                                                                                                                                                                                                                                                                                                               |
| EPI_ISL_645044                 | Human Genome Variation Research Group, Malopolska Centre of Biotechnology                                                  | Human Genome Variation Research Group, Malopolska Centre of Biotechnology                                                                 | Antonin Bal, Gregory Destras, Gwendolyne Burfin, Hadrien Règue, Quentin Semanas, Martine Valette, Bruno Lina, Michel Segondy, Vincent Foulongne, Laurence Josset                                                                                                                                                                                                                                                                                                                                                                                                                                                                                 |
| EPI_ISL_649064                 | Israel Central Virology laboratory                                                                                         | Israel Central Virology laboratory                                                                                                        | Kowalski,M., Pospiech,E., Klajmon,A., Gromowski,T., Pisarek,A., Marszalek,K., Kopera,K., Foremny,J., Swadzba,J., Sanak,M., Owczarek,K., Dabrowska,A., Szczepanski,A., Botwina,P., Labaj,P.P., Pyrc,K., Branicki,W.                                                                                                                                                                                                                                                                                                                                                                                                                               |
| EPI_ISL_672138                 | The Ashley Laboratory, Stanford University                                                                                 | Chan-Zuckerberg Biohub                                                                                                                    | Neta Zuckerman, Efrat Dahan Bucris, Oran Erster, Ella Mendelson, Michal Mandelboim                                                                                                                                                                                                                                                                                                                                                                                                                                                                                                                                                               |
| EPI_ISL_676593                 | Scientific Veterinary Institute Novi Sad                                                                                   | Veterinary Specialized Institute "Kraljevo", Serbia                                                                                       | CZB Cliahub Consortium                                                                                                                                                                                                                                                                                                                                                                                                                                                                                                                                                                                                                           |
| EPI_ISL_693597                 | Instituto Nacional de Saude (INSA)                                                                                         | Instituto Nacional de Saude (INSA)                                                                                                        | Vidanovic,D., Tesovic,B., Knezevic,A., Jovanovic,T., Jankovic,M., Sekler,M., Banovic Djeri,B., Petrovic,T., Volkening,J., Afonso,C.                                                                                                                                                                                                                                                                                                                                                                                                                                                                                                              |
|                                |                                                                                                                            |                                                                                                                                           | Borges et al                                                                                                                                                                                                                                                                                                                                                                                                                                                                                                                                                                                                                                     |

|                                                                                                                                                                                                                                                |                                                                                                               |                                                                                             |                                                                                                                                                                                                                                                                                                                                                                                                                                                                    |
|------------------------------------------------------------------------------------------------------------------------------------------------------------------------------------------------------------------------------------------------|---------------------------------------------------------------------------------------------------------------|---------------------------------------------------------------------------------------------|--------------------------------------------------------------------------------------------------------------------------------------------------------------------------------------------------------------------------------------------------------------------------------------------------------------------------------------------------------------------------------------------------------------------------------------------------------------------|
| EPI_ISL_699147                                                                                                                                                                                                                                 | Group 42 (G42) Healthcare, Abu Dhabi, United Arab Emirates;<br>Department of Health, The United Arab Emirates | G42 Healthcare                                                                              | Rong Liu, Pei Wu, Sally Mahmoud, Ke Liang, Pauline Ogradzki, Pengjuan Liu, Stephen S. Francis, Tao Ma, Hanif Khalak, Fang Chen, Denghui Liu, Junhua Li, Weibin Liu, Wenjun He, Xinyu Huang, Zhaorong Yuan, Long Lin, Nan Qiao, Xin Meng, Budoor Alqarni, Javier Quilez, Vinay Kusuma, Xin Jin, Xavier Anton, Ashish Koshy, Huanming Yang, Xun Xu, Jian Wang, Peng Xiao, Nawal Ahmed Mohamed Al Kaabi, Mohammed Saifuddin Fasihuddin, Siyang Liu, Walid Abbas Zaher |
| EPI_ISL_735422                                                                                                                                                                                                                                 | UBS Dematchi                                                                                                  | Instituto Adolfo Lutz, Interdisciplinary Procedures Center,<br>Strategic Laboratory         | Claudio Tavares Sacchi, Claudia Regina Gonçalves, Erica Valessa Ramos Gomes, Karoline Rodrigues Campos                                                                                                                                                                                                                                                                                                                                                             |
| EPI_ISL_759955                                                                                                                                                                                                                                 | Primasatya Husada Citra Hospital                                                                              | Institute of Tropical Disease, Universitas Airlangga                                        | Aldise M Nastri, Jezzy R Dewantari, Rima R Prasetya, Krisnoadi Rahardjo, Pudji Djanuartono, Gatot Soegiarto, Laksmi Wulandari, Resti Yudhawati, Soetjipto, Yasuko Mori, Maria I Lusida, Kazufumi Shimizu                                                                                                                                                                                                                                                           |
| EPI_ISL_766861, EPI_ISL_766862, EPI_ISL_766863, EPI_ISL_766864, EPI_ISL_766865, EPI_ISL_766866, EPI_ISL_766867, EPI_ISL_766868, EPI_ISL_766869, EPI_ISL_766870, EPI_ISL_766871, EPI_ISL_766872, EPI_ISL_766873, EPI_ISL_766874, EPI_ISL_766875 |                                                                                                               |                                                                                             |                                                                                                                                                                                                                                                                                                                                                                                                                                                                    |
| see above                                                                                                                                                                                                                                      | NIC Viral Respiratory Unit - Institut Pasteur of Algeria                                                      | National Reference Center for Viruses of Respiratory<br>Infections, Institut Pasteur, Paris | Mélanie Albert, Marion Barbet, Sylvie Behillil, Méline Bizard, Angela Brisebarre, Flora Donati, Etienne Simon-Lorière, Vincent Enouf, Maud Vanpeene, Sylvie van der Werf, Fawzi Derrar                                                                                                                                                                                                                                                                             |
| EPI_ISL_794604                                                                                                                                                                                                                                 | Central Laboratories, Egyptian Ministry of Health and<br>Population                                           | Central Laboratories, Egyptian Ministry of Health and<br>Population                         | Kayed,A.E., Roshdy,W.H., El-Shesheny,R., Mostafa,A., Khalifa,M.K., Shehata,M., Shawky,S., Saleh,M., Gomaa,M., El Taweel,A., Mahmoud,S.H., Moatasim,Y., Kuitkat,O., Kamel,M.N., Mahrous,N., El Sayes,M.A., El Guindy,N.M., Naguib,A., Kandeil,A., Kayali,G., Ali,M.A.                                                                                                                                                                                               |
| EPI_ISL_860556                                                                                                                                                                                                                                 | NHLS-IALCH                                                                                                    | KRISP, KZn Research Innovation and Sequencing Platform                                      | Giandhari J, Pillay S, Lessells R, Mdlalose K, York D, Khan S, Tegally H, Wilkinson E, de Oliveira T                                                                                                                                                                                                                                                                                                                                                               |
| EPI_ISL_940753                                                                                                                                                                                                                                 | University of Bari Biomedical Sciences and Human Oncology                                                     | University of Bari Biomedical Sciences and Human Oncology                                   | Chironna M., Sallustio A., Loconsole D., Accogli M.                                                                                                                                                                                                                                                                                                                                                                                                                |
| EPI_ISL_978540                                                                                                                                                                                                                                 | Centre de Virologie des Maladies infectueuses Tropicales                                                      | Functional Genomic Platform UATRS-biology, CNRST                                            | Abdelilah LARAQUI, Nadia Touil, Mly Abdelaziz ELALAOUI, Sanaa ALAOUI-Amine, Tahar BAJJOU, Marouane MELLOUL, Farida HILALI, Hemlali Mouhssine, Abderrazzak Rfaki, Elmostafa BENAÏSSA, Yassine SEKHSOKH, , Elmostafa EL FAHIME, Mostafa ELOUENNASS, Khalid ENNIBI.                                                                                                                                                                                                   |
