# Supplementary figures and images for: The Algerian Chapter of SARS-CoV-2 Pandemic: An Evolutionary, Genetic, and Epidemiological Prospect
Source: MDPI journal article supplement (doi:10.3390/v13081525), 2021-08-02

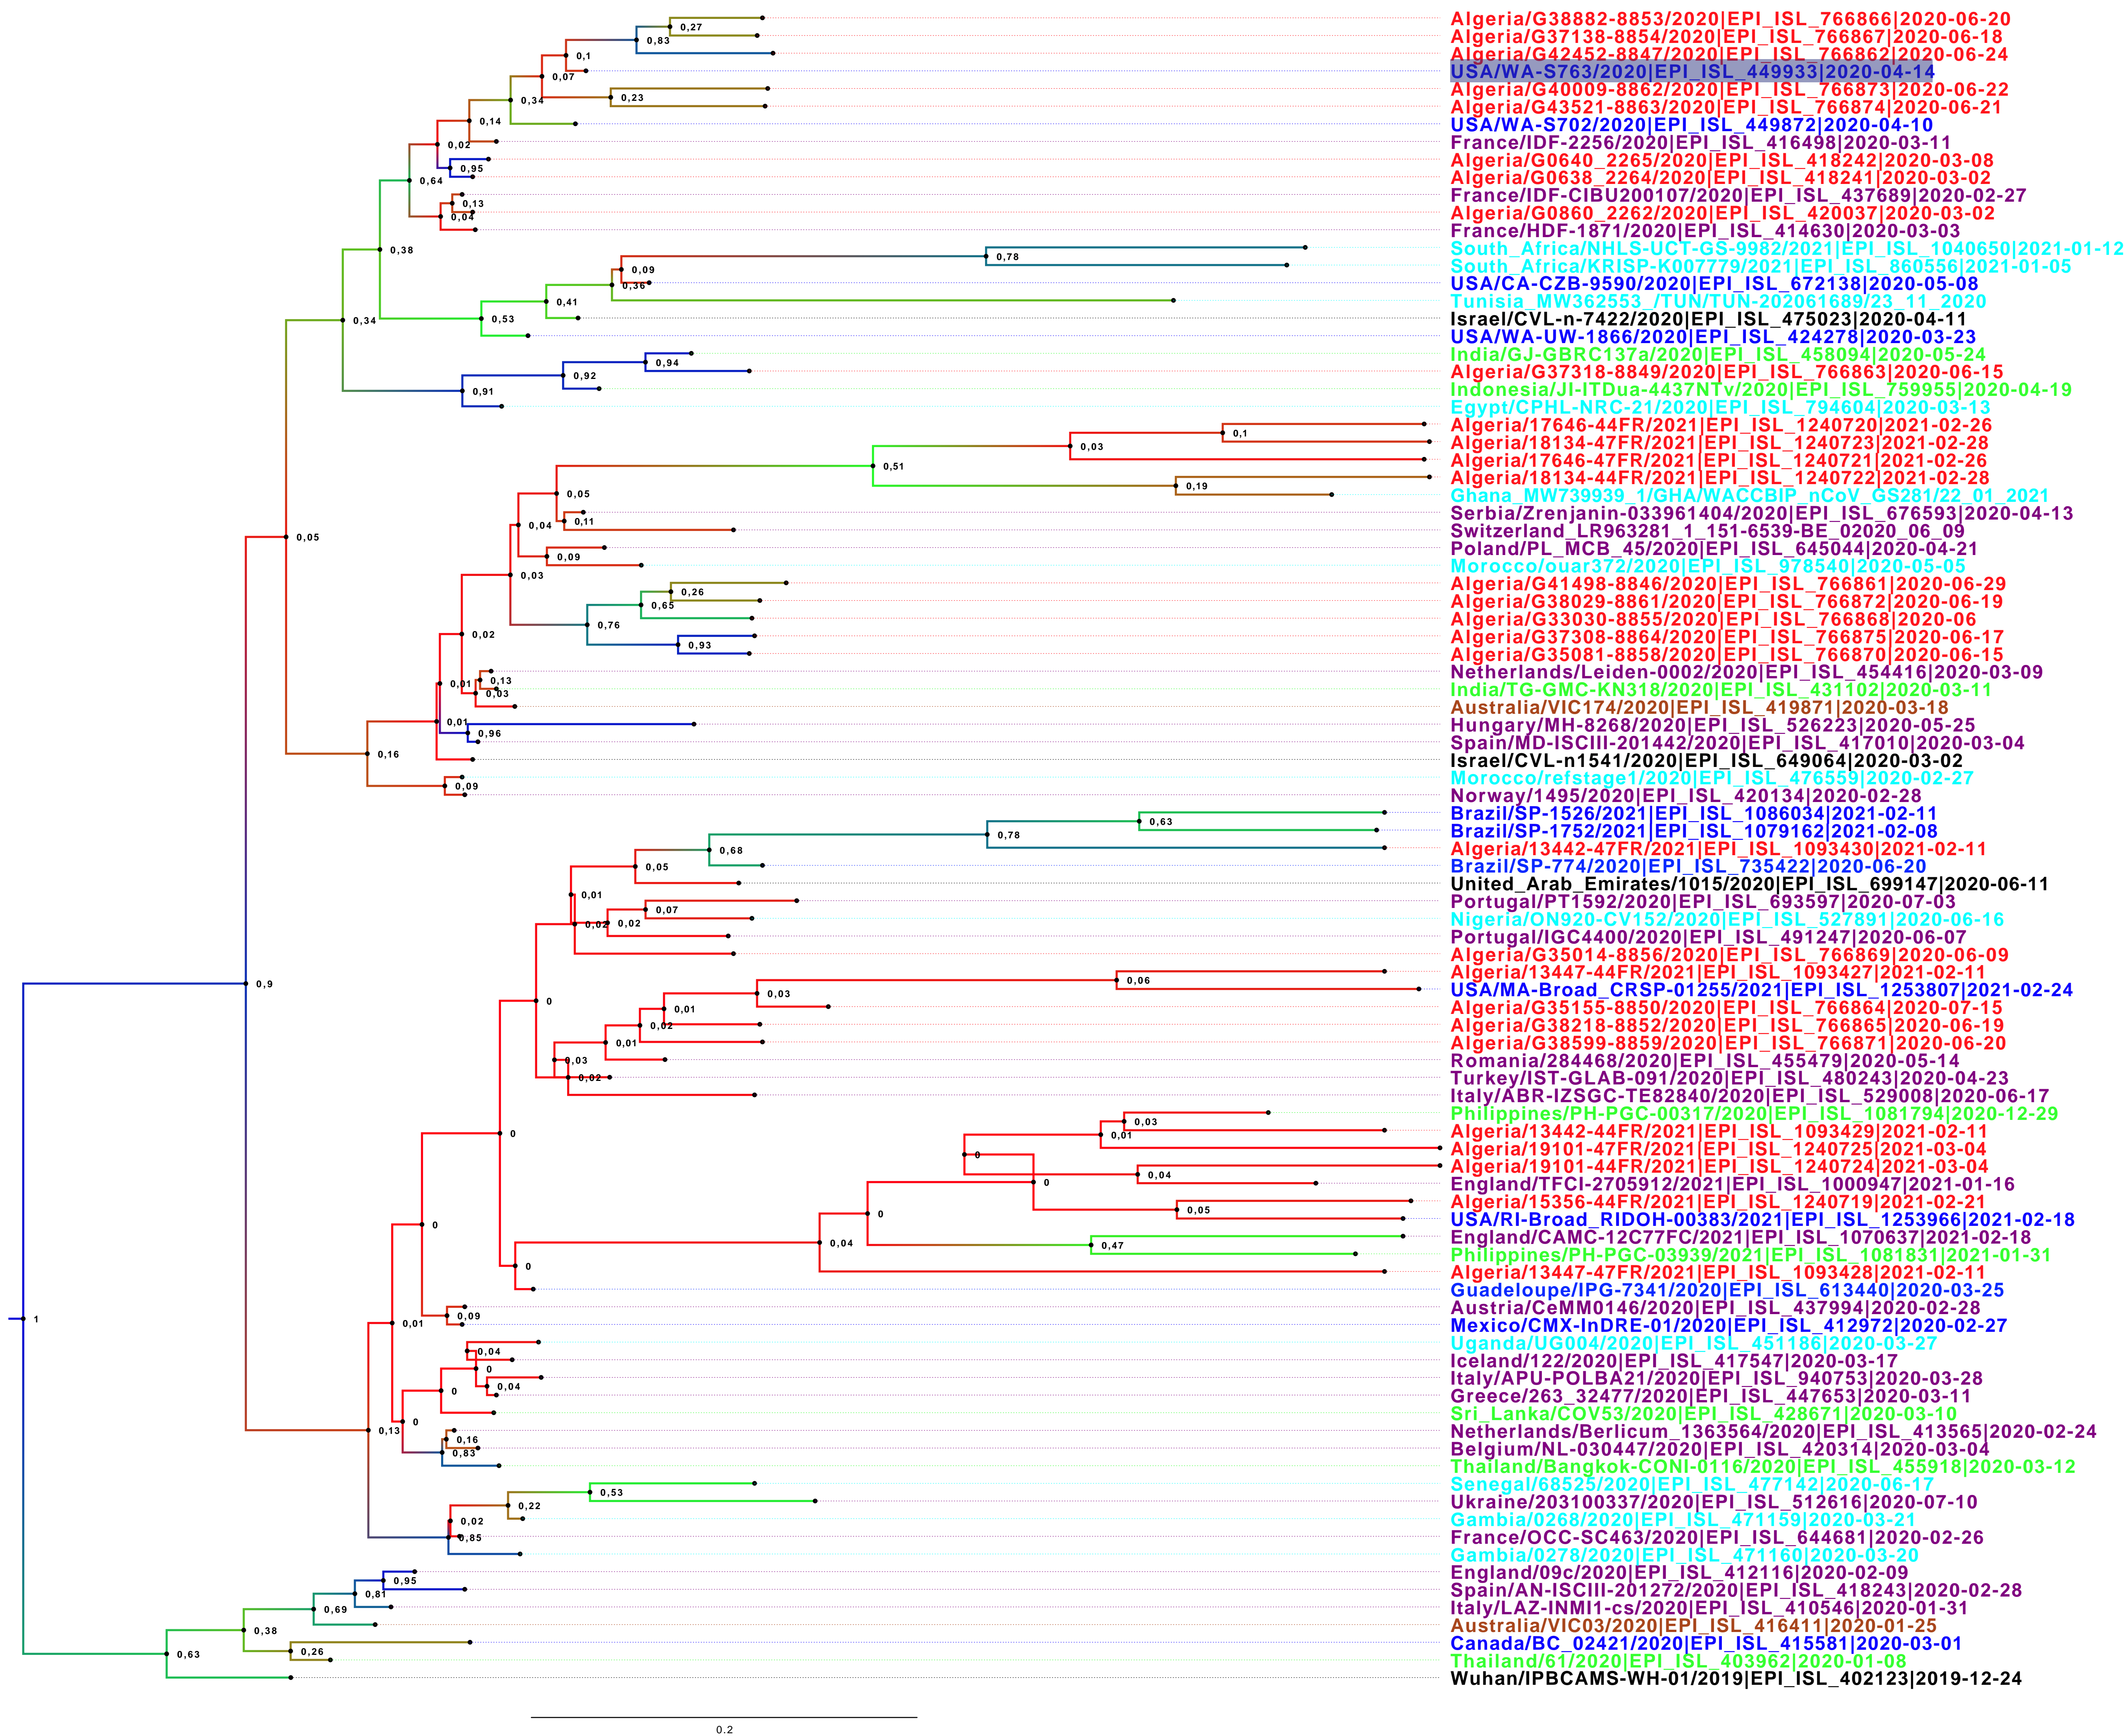

Supplement: s1 [file s1]
